# Supplementary material
Source: PubMed Central journal article supplement (PMC2671077)
Supplement: NIHMS64589-supplement-01.pdf [file NIHMS64589-supplement-01.pdf]

## Supplemental data

### Supplemental Tables

**Table S1**

Changes in marker gene expression domains after injection of hormone-inducible constructs with or without dexamethasone (DEX) treatments

| <b>Marker gene</b>                     | <b>DEX-treated controls</b> | <b><i>GR-Six1</i> no DEX</b> | <b><i>GR-Six1</i> DEX at cleavage</b> | <b><i>GR-Eya1</i> no DEX</b> | <b><i>GR-Eya1</i> DEX at cleavage</b> |
|----------------------------------------|-----------------------------|------------------------------|---------------------------------------|------------------------------|---------------------------------------|
|                                        | % (n)                       | % (n)                        | % (n)                                 | % (n)                        | % (n)                                 |
| <i>Sox2</i><br>(placode)               | 4 ↓ (23);<br>0 e (23)       | 3 ↓ (76);<br>5 e (76)        | 85 ↓ (27);<br>36 e (22)               | 5 ↓ (21);<br>0 e (21)        | 50 ↓ (28);<br>36 e (28)               |
| <i>NeuroD</i><br>(placode)             | 3 ↓ (29);<br>0 e (29)       | 12 ↓ (25)                    | 58 ↓ (24);<br>0 e (24)                | 13 ↓ (29)                    | 50 ↓ (12);<br>50 e (12)               |
| <i>p27<sup>Xicl</sup></i><br>(placode) | NC (47);<br>0 e (47)        | 12 ↓ (16);<br>6 e (16)       | 67 ↓ (18);<br>39 e (18)               | NC (20)                      | 77 ↑ (13)                             |

n: number of embryos analyzed at stages 16-22. NC: no change in expression compared to control side of same embryo. ↓: fainter expression or reduced expression domain; ↑: broader expression domain; e: ectopic expression domain.

## Supplemental Figures

**Fig. S1** Sequences and specificity of *Sox2* and *Sox3* morpholinos. The *Sox3* MO differed in 12 out of 25 positions from the *Sox2* sequence, 17 out of 25 positions from the *Sox1* sequence, and 15 out of 25 from the *SoxD* sequence. The *Sox2* MO differed from *Sox3* mRNA at 11 out of 25 positions, 17 out of 25 position from the *Sox1* sequence, and at 13 out of 25 positions from *SoxD*.
