# Supplementary material
Source: PubMed Central journal article supplement (PMC2671077)
Supplement: NIHMS64589-supplement-02.pdf [file NIHMS64589-supplement-02.pdf]

SOX3M0 AC TTC GAG GTT TAC ATA TCG TAC AA  
 17/25 XI XXI IIX XXI III IIX III III XI  
 SOX1 cac ccc ggg aag ctg ctg tga ATG TAC AGC ATG ATG ATG  
  
 SOX2 tgc tcc cca cac gcc gcc tcg ATG TAC AGC ATG ATG GAG ACC GAG  
 13/25 XX XXX XXI XXX III IIX III III XI  
 SOX3M0 3' AC TTC GAG GTT TAC ATA TCG TAC AA 5'  
 II III III III III III III III III II  
 SOX3 gtt tcc cac ctg cag ctc caa ATG TAT AGC ATG TTG GAC ACC GAC  
 III I I I III III III III III III III  
 SOX2 tgc tcc cca cac gcc gcc tcg ATG TAC AGC ATG ATG GAG ACC GAG  
 I III III III III III III III III III  
 SOX2M0 3' G CGG AGC TAC ATG TCG TAC TAC CTC 5'  
 14/25 X XXI XXX III IIX III III XX IIX  
 SOX3 gtt tcc cac ctg cag ctc caa ATG TAT AGC ATG TTG GAC ACC GAC  
  
 SOX1 cac ccc ggg aag ctg ctg tga ATG TAC AGC ATG ATG ATG  
 17/25 X XXX IXX III III III III III XXI  
 SOX2M0 G CGG AGC TAC ATG TCG TAC TAC CTC
